# Supplementary material for: Design, synthesis and biological evaluation of methyl-2-(2-(5-bromo benzoxazolone)acetamido)-3-(1H-indol-3-yl)propanoate: TSPO ligand for SPECT
Source: Royal Society of Chemistry journal article supplement (doi:10.1039/c6ra19514h), 2016-01-01
Supplement: c6ra19514h1.pdf [file c6ra19514h1.pdf]

## Supplementary data

### **Design, synthesis and biological evaluation of methyl-2-(2-(5-bromo benzoxazolone)acetamido)-3-(1*H*-indol-3-yl)propanoate: TSPO ligand for SPECT**

Pooja Srivastava<sup>1,2\*</sup>, Ankur Kaul, Himanshu Ojha, Pravir Kumar<sup>2</sup>, Anjani K Tiwari<sup>1\*</sup>

<sup>1</sup>Division of Cyclotron and Radiopharmaceutical Sciences, Institute of Nuclear Medicine and Allied Sciences, Brig. S. K. Mazumdar Road, Delhi-110054, India

<sup>2</sup>Molecular Neuroscience and Functional Genomics Laboratory, Department of Biotechnology, Delhi Technological University, Delhi 110042, India

## Comparative docking studies

The affinity of MBIP towards TSPO has been validated through docking studies using wild type as well as mutant PDBs of TSPO. Wild type (4RYO and 4RYQ) as well as mutant (4UC1) PDBs were taken for docking studies from different sources such as BcTSPO and RsTSPO.

| Interaction sites for MBIP |                                                                                                                                                                                |
|----------------------------|--------------------------------------------------------------------------------------------------------------------------------------------------------------------------------|
| <b>4RYQ</b>                | Tyr19, Ser21, Ser22, Val23, Ile27, Tyr32, Gly44, Met45, Ile47, Gly48, Met49, <b>Try51</b> , Phe55, Phe 90, Ser91, Gln94, Phe95, Trp138, Phe141, Ala142, Thr143, Leu145, Ser146 |
| <b>4RYO</b>                | Tyr19, Ser21, Ser22, Ile27, Arn29, Tyr32, Gly44, Ile47, Gly48, Try51, Ala52, Phe55, Asn87, Gln88, Phe90, Ser91, Gln94, Phe95, Cys107, Val110, Ala142,                          |
| <b>4UC1</b>                | Ala19, Thr21, Gly22, Ala23, Leu25, Tyr31, Trp39, Asn40, Arg43, Trp44, Phe46, Pro47, Trp50, Thr51, Tyr54, Trp87, Thr88, Phe91, Phe92, Try139, Ala138, Leu142, Asn143            |

### Energetic of MBIP with two PDBs

|      | Glide<br>gscore | Glide<br>lipo | Glide<br>hbond | Glide<br>evdw | Glide<br>ecoul | Glide<br>erotb | glide<br>esite | glide<br>emodel | Glide<br>energy |
|------|-----------------|---------------|----------------|---------------|----------------|----------------|----------------|-----------------|-----------------|
| 4RYQ | -6.922          | -3.947        | -0.320         | -9.504        | -5.659         | 0.453          | 0.000          | -15.360         | -15.163         |
| 4RYO | -7.011          | -3.337        | -0.360         | -11.123       | -5.885         | 0.453          | -0.005         | -25.190         | -17.008         |

## SPECT image with $^{99m}\text{Tc}$ -MBIP

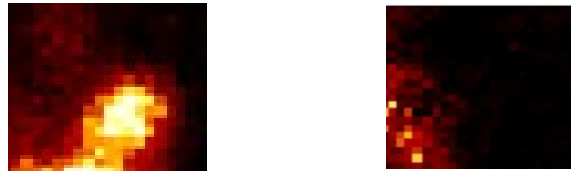

Blocking study of  $^{99m}\text{Tc}$  MBIP at 40 min in peripheral organ

**10 MIN POST INJECTION OF PK11195 (5 mg/kg)**
